# Supplementary material for: A systems biology approach to analyse amplification in the JAK2-STAT5 signalling pathway
Source: Springer Nature journal article supplement (doi:10.1186/1752-0509-2-38), 2008-04-25

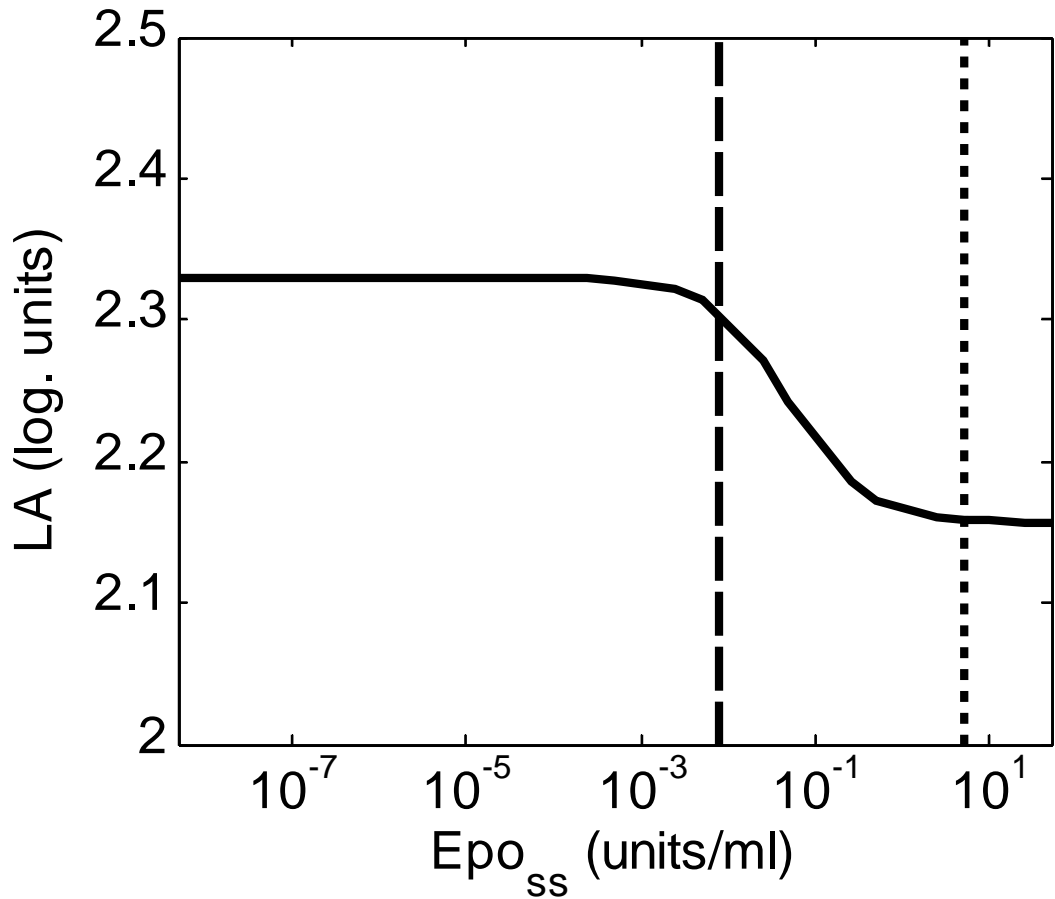

Supplement: 12918_2008_195_MOESM5_ESM.pdf [file 12918_2008_195_MOESM5_ESM.pdf]
