# Supplementary material for: A systems biology approach to analyse amplification in the JAK2-STAT5 signalling pathway
Source: Springer Nature journal article supplement (doi:10.1186/1752-0509-2-38), 2008-04-25

LA (log. units)

2.5  
2.25  
2  
1.75  
1.5

$10^3$   
 $10^2$   
T  
 $10^1$   
 $10^0$

$10^0$   $10^{-2}$   $10^{-4}$   $10^{-6}$   
Epo<sub>osc</sub>

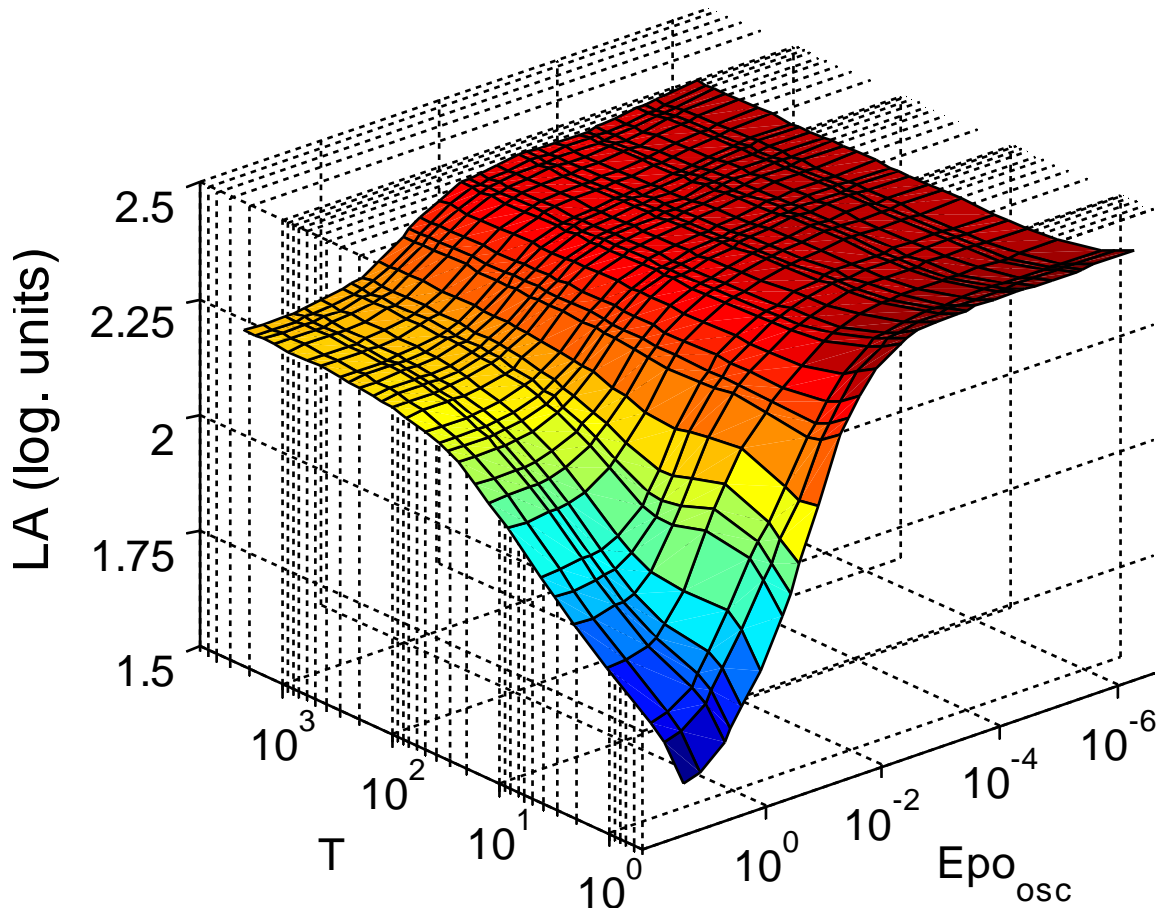

Supplement: 12918_2008_195_MOESM10_ESM.pdf [file 12918_2008_195_MOESM10_ESM.pdf]
